# Supplementary material for: High CD169 Monocyte/Lymphocyte Ratio Reflects the Immunophenotyping Disruption and Predicts Oxygen Need in COVID-19 Patients
Source: Preprints.org preprint supplement (doi:10.20944/preprints202105.0731.v1), 2021-05-31
Supplement: Supplementary file 1 [file supplementary]

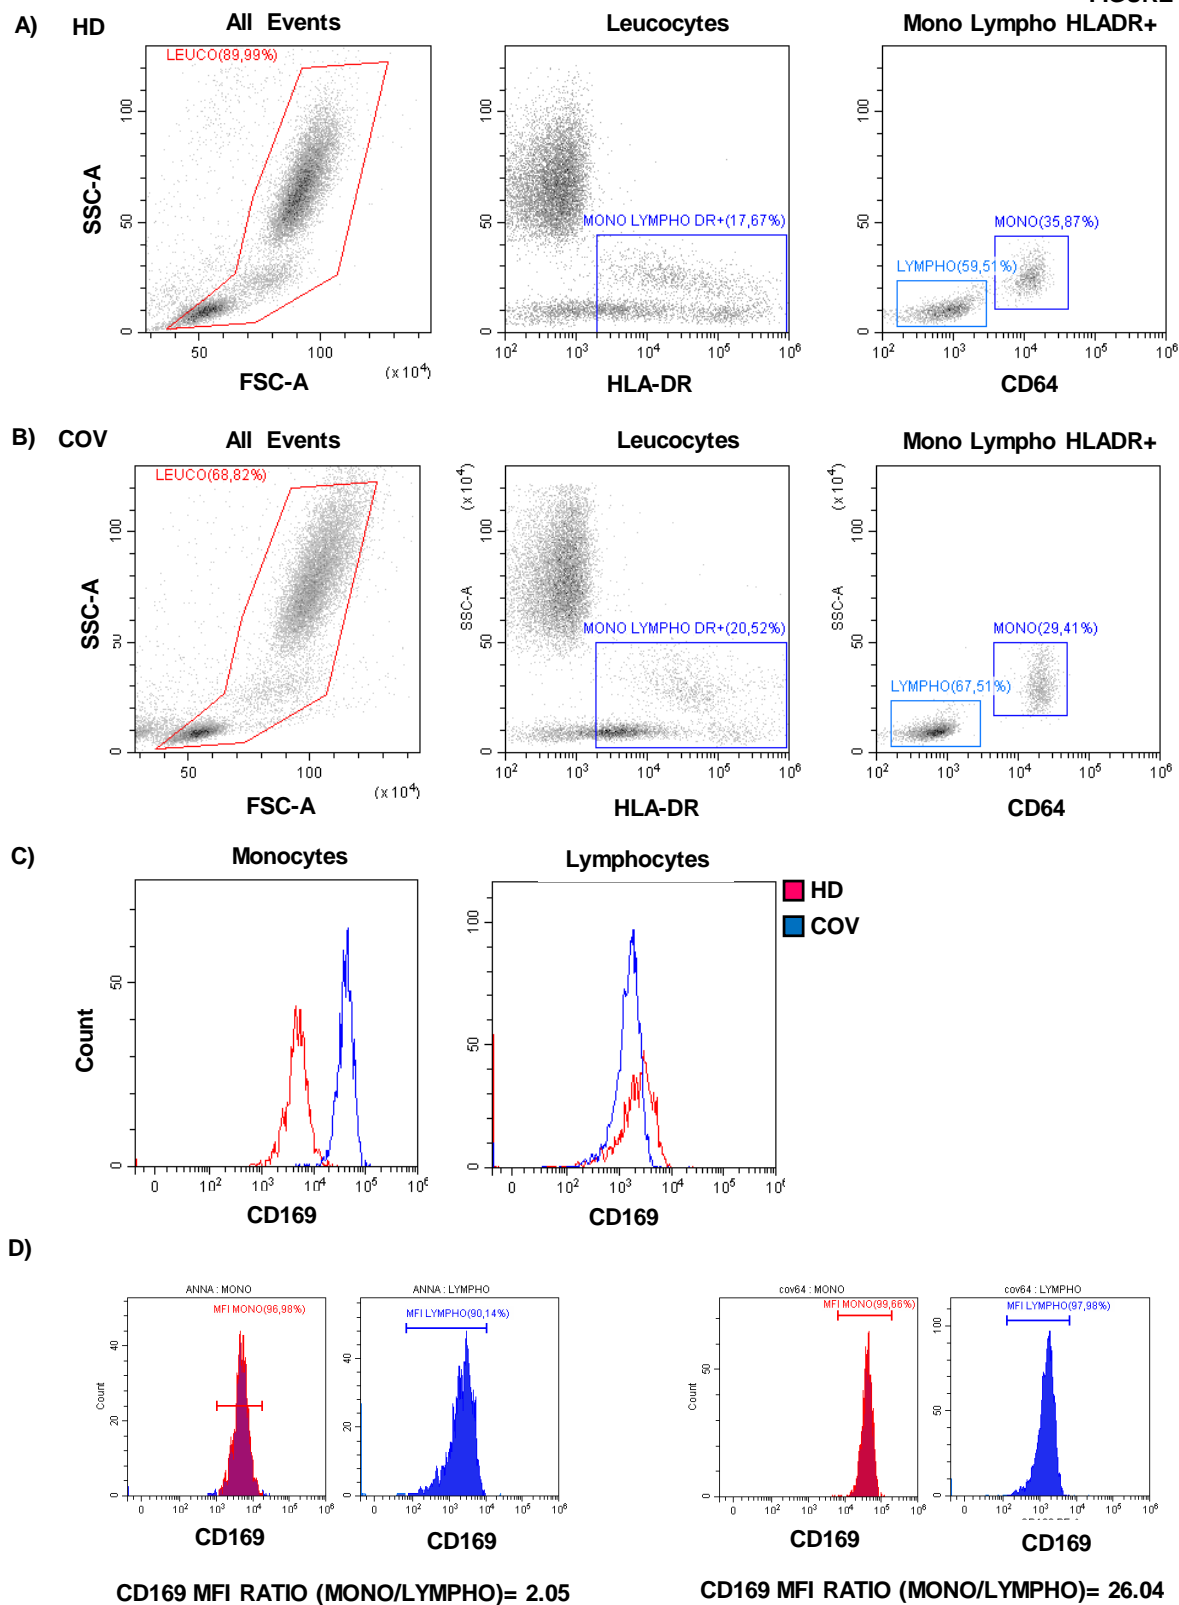

**Figure S1. Gating strategy for flow cytometry analysis.** Analysis of the mean intensity of CD169 PE, CD64 PB and HLA-DR APC fluorescence in Leukocytes. a representative gating strategy in healthy donor (HD, A) and in a COVID-19 patient (COV, B) in Leukocytes, FSC vs SSC dot plots on Leukocytes (left panel), a gate on HLADR + monocytes and Lymphocytes was created (middle panel) and in this gate, a CD64+ monocytes and CD64- lymphocytes gates were designed.

c) In monocytes and lymphocytes Histogram overlay of CD169 MFI d) calculation of the CD169 RATIO between MFI in monocytes and lymphocytes
